# Supplementary material
Source: PubMed Central journal article supplement (PMC9662905)
Supplement: cd-21-1463_supplementary_figures_suppsf1-sf7.pdf [file cd-21-1463_supplementary_figures_suppsf1-sf7.pdf]

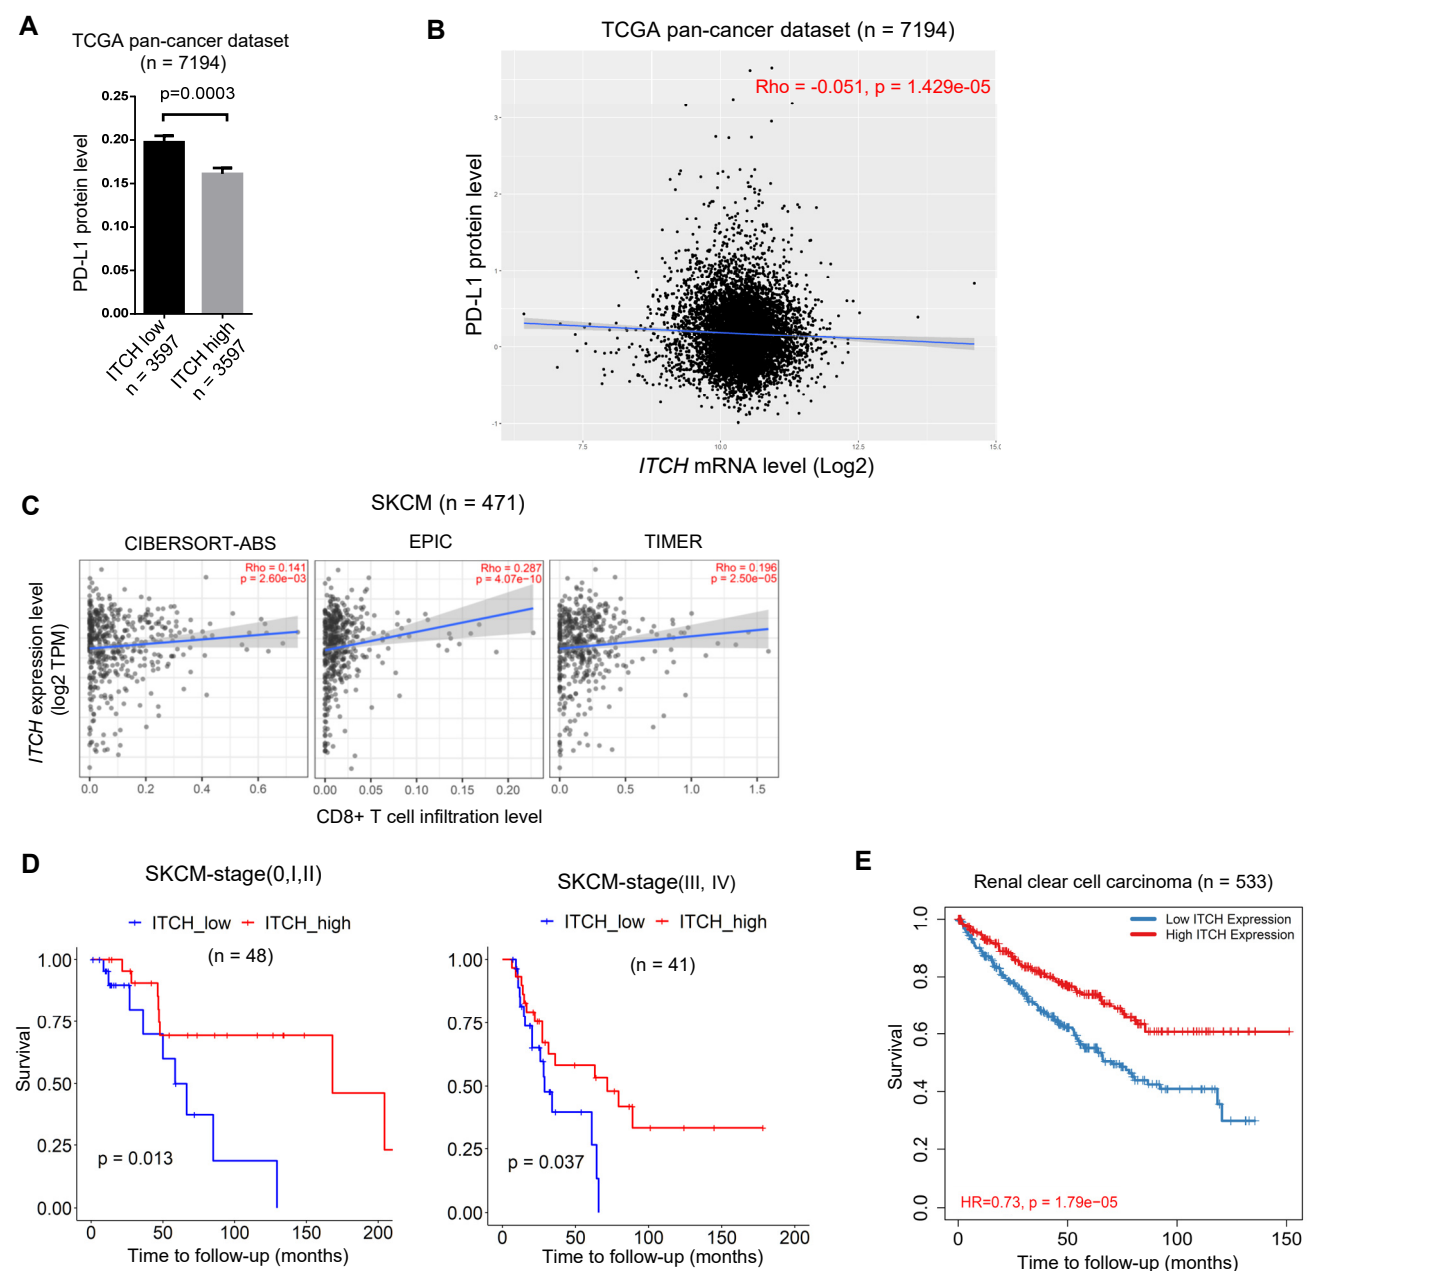

**Supplementary Figure S1.** Correlations between tumoral *ITCH* RNA expression and PD-L1 protein levels, CD8<sup>+</sup> T-cell infiltration, or patient survival.

**A**, PD-L1 protein levels compared by splitting 7,194 patient-derived tumors with matched RNA-seq data and PD-L1 protein levels (measured by reverse-phase protein array from 32 TCGA cancer types) into top versus bottom 50% of *ITCH* RNA expression levels. P value as indicated, Student *t* test.

**B**, Spearman's correlation score (Rho) between intra-tumoral *ITCH* RNA levels and PD-L1 protein levels in 7,194 tumors of 32 TCGA cancer types.  $Rho = -0.051$ , negative correlation.  $P = 1.429e-05$ .

**C**, Spearman's correlation score (Rho) between intra-tumoral *ITCH* RNA levels and CD8<sup>+</sup> T-cell infiltration levels in TCGA-SKCM dataset (n = 471) calculated by three different algorithms (CIBERSORT-ABS, EPIC and TIMER).  $Rho > 0$ , positive correlation. P values, as indicated.

**D**, Kaplan-Meier survival curve of stage-matched patients from TCGA-SKCM dataset with high (top 10%) versus low (bottom 10%) intra-tumoral *ITCH* expression (early stage: stage 0, I, II combined, n = 231; left panel) or high (top 15%) versus low (bottom 15%) intra-tumoral *ITCH* expression (late stage: stage III, IV combined, n = 193; right panel). Time of diagnosis as starting time for follow-up. P values, log-rank test.

**E**, Kaplan-Meier survival curve of patients from TCGA renal clear cell carcinoma dataset with high (top 50%) versus low (bottom 50%) intra-tumoral *ITCH* expression. Time of diagnosis as starting time for follow-up. P values, log-rank test. HR, hazard ratio.

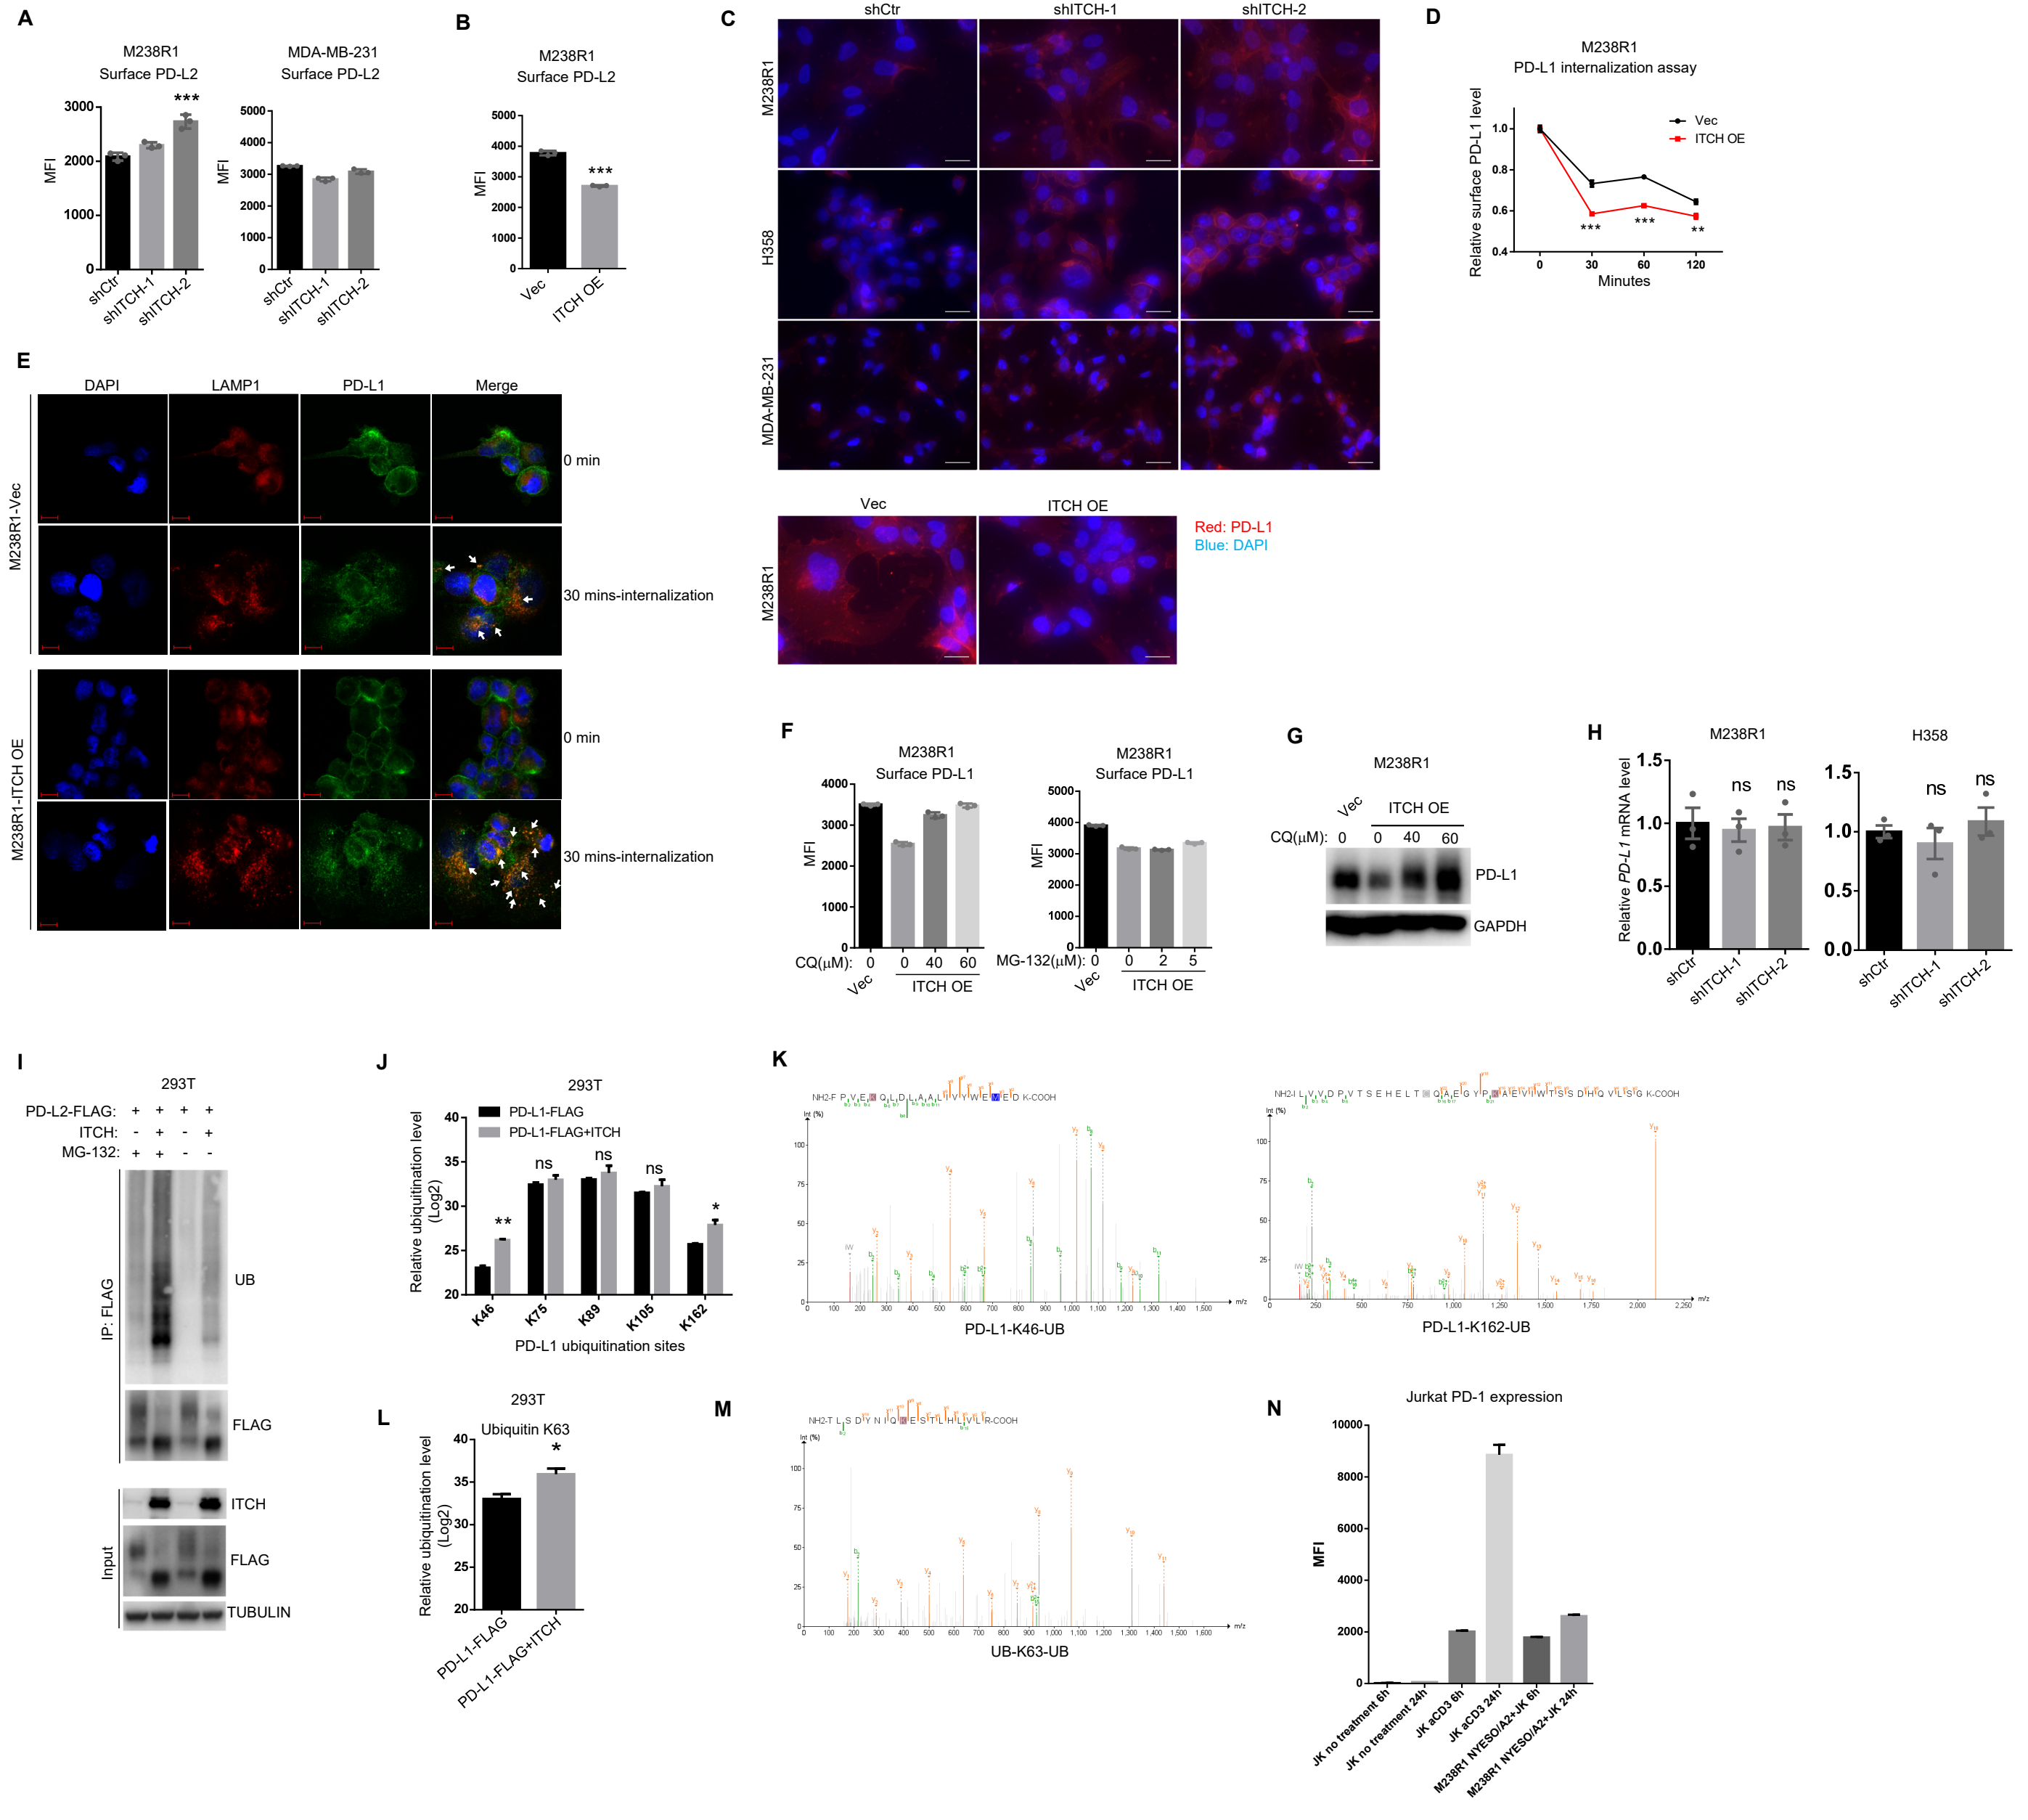

**Supplementary Figure S2.** Physical and functional interactions between ITCH and PDL1/L2.

**A,** Cell-surface levels of PD-L2 in M238R1 (left) and MDA-MB-231 (right) cells stably expressing control shRNA (shCtr) or ITCH-targeting shRNAs (shITCH-1, shITCH-2), as measured by cell-surface staining and FACS analysis (PD-L2 is not detectable in H358 cells). MFI, mean fluorescence intensity. Mean  $\pm$  SEMs (n = 3).

**B,** Cell-surface levels of PD-L2 in M238 R1 cells stably expressing empty vector (Vec) or over-expressing (OE) ITCH, as measured by cell-surface staining and FACS analysis. Mean  $\pm$  SEMs (n = 3).

**C,** Cell-surface levels of PD-L1 in M238R1, H358, and MDA-MB-231 stably expressing control shRNA (shCtr) or ITCH-targeting shRNAs (shITCH-1, shITCH-2) and M238R1 stably expressing empty vector (Vec) or OE ITCH, as measured by immunofluorescence staining. Scale bar = 20  $\mu$ m.

**D,** PD-L1 internalization in M238 R1 cells stably expressing empty vector (Vec) or OE ITCH, as measured by FACS analysis. Mean  $\pm$  SEMs (n = 3).

**E,** Confocal microscopic imaging of M238 R1 cells stably expressing empty vector (Vec) or OE ITCH before (0 min) and 30 minutes after initiating surface PD-L1 internalization. Small white arrows, co-localization of PD-L1 and the lysosome marker, LAMP1. Scale bar = 10  $\mu$ m.

**F,** M238 R1 cells stably expressing Vec or OE ITCH were treated with indicated concentrations of chloroquine (CQ) (left) or MG-132 (right) for 16 hours, followed by measurement of cell-surface levels of PD-L1 by cell-surface staining and FACS analysis. Mean  $\pm$  SEMs (n = 3).

**G,** M238 R1 cells stably expressing Vec or ITCH were treated with indicated concentrations of chloroquine (CQ) for 16 hours, followed by measurement of total PD-L1 level by Western blots (WBs).

**H,** Real-time PCR of *PD-L1* mRNA levels in M238 R1 or H358 stably expressing control and ITCH-shRNAs. Mean  $\pm$  SEMs (n = 3).

**I,** HEK 293T cells expressing PD-L2-FLAG, with or without ITCH co-transfection, were pre-treated with or without MG-132 (20  $\mu$ M) for 4 hours followed by anti-FLAG IP and detection of UB by WBs.

**J,** HEK 293T cells expressing PD-L1-FLAG, with or without ITCH co-transfection, were subjected to anti-FLAG immunoprecipitation and mass spectrometry analysis. Quantification of the indicated ubiquitination sites on PD-L1 is shown (log2).

**K,** Tandem mass spectra of the ubiquitinated PD-L1-K46 (left) or PD-L1-K162 (right) peptides.

**L,** As in **J**, except quantification of K63 ubiquitination on ubiquitin.

**M,** Tandem mass spectrum of the ubiquitinated ubiquitin-K63 peptide.

**N,** Jurkat cell-surface PD-1 expression measured by FACS analysis after indicated treatments or co-culture with M238R1-NYESO/A2 cells.

P value, Student's *t* test, ns, not significant. \* p < 0.05. \*\* p < 0.01, \*\*\* p < 0.001.

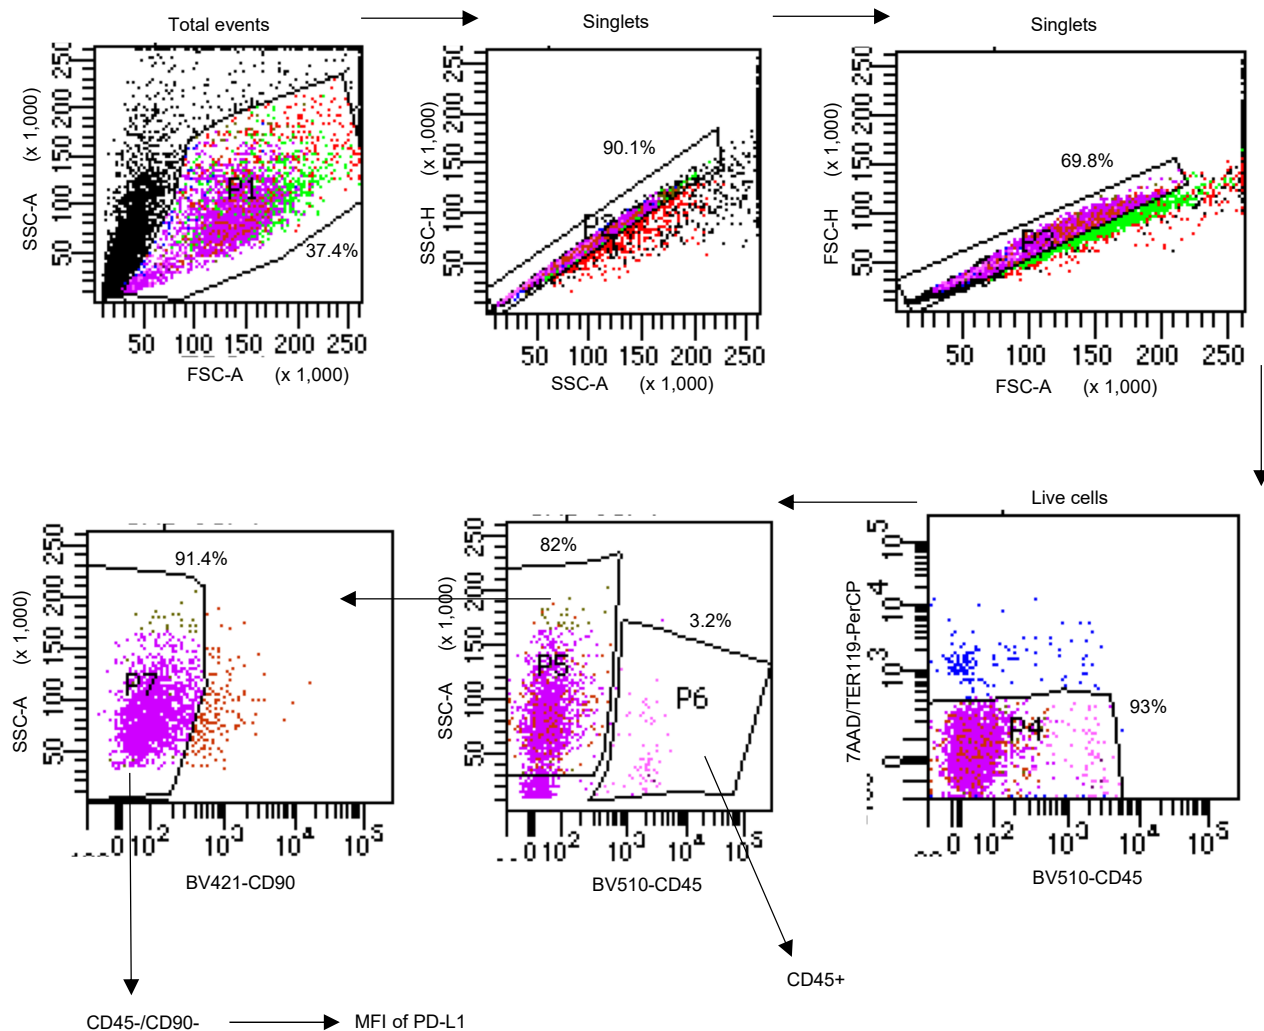

**Supplementary Figure S3.** Gating strategy for FACS analysis.

An example shown following tumor dissociation, with percentages at each step of gating the parental populations.

**A**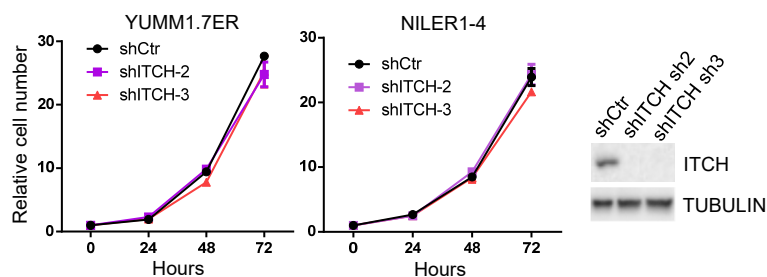**B**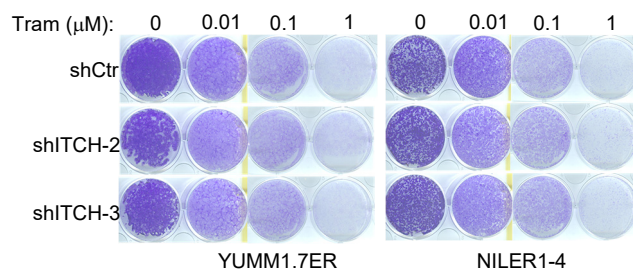

**Supplementary Figure S4.** Impact of *Itch* knockdown on *in vitro* growth of murine melanoma cell lines.

**A**, Growth curves of cultured YUMM1.7ER and NILER1-4 cell lines stably expressing control or ITCH-shRNAs (left and middle). Mean  $\pm$  SEMs (n = 3). WBs of YUMMER1.7 cell lines stably expressing control or ITCH-shRNAs (right).

**B**, Clonogenic growth (10 days) of YUMM1.7ER and NILER1-4 cell lines stably expressing control and ITCH-shRNAs off or on trametinib (Tram) treatment at indicated concentrations.

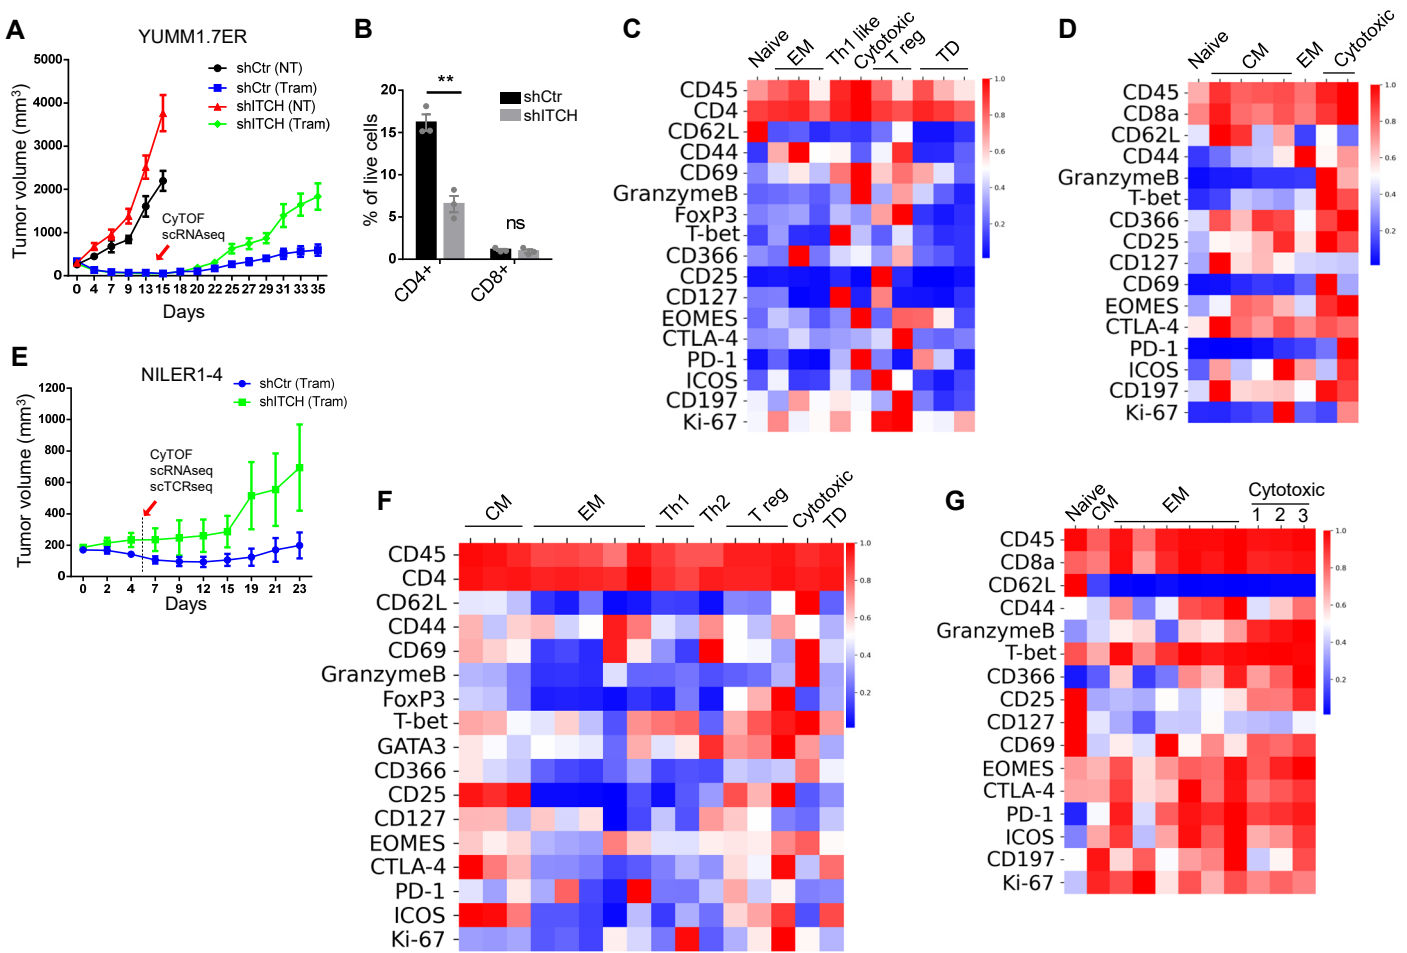

**Supplementary Figure S5.** Effects of ITCH or PD-L1 expression on immune infiltration or immune cell gene expression.

**A**, Tumor growth curves of shCONTROL (shCtr) and ITCH-knockdown (shITCH-3) YUMM1.7ER melanoma under no treatment or on trametinib (Tram, 1 mg/kg/d) treatment in C57BL/6 mice. shCONTROL and ITCH-knockdown tumors (n = 3) after 14 days of trametinib treatment were dissociated into single cells followed by CyTOF and scRNA-seq analysis. Mean  $\pm$  SEMs (n = 8 for NT groups and n = 10 for Tram groups).

**B**, Fraction of CD4<sup>+</sup> or CD8<sup>+</sup> cells in total live cells from shCONTROL and ITCH-knockdown YUMM1.7ER tumors. Mean  $\pm$  SEMs (n = 3). P value, Student's *t* test, \*\* *p* < 0.01, ns: not significant.

**C**, Heatmap showing scaled mean expression levels of indicated markers in different cell clusters of CD4<sup>+</sup> T cells (YUMM1.7ER).

**D**, Heatmap showing scaled mean expression levels of indicated markers in different cell clusters of CD8<sup>+</sup> T cells (YUMM1.7ER).

**E**, Tumor growth curves of shCONTROL (shCtr) and ITCH-knockdown (shITCH mix) NILER1-4 melanoma under trametinib (Tram, 3 mg/kg/d) treatment in C57BL/6 mice. shCONTROL and ITCH-knockdown tumors (n = 4) after 5 days of trametinib treatment were dissociated into single cells followed by CyTOF and scRNA-seq analysis. Mean  $\pm$  SEMs (n = 8 for NT groups and n = 10 for Tram groups).

**F**, Heatmap showing scaled mean expression levels of indicated markers in different cell clusters of CD4<sup>+</sup> T cells (NILER1-4).

**G**, Heatmap showing scaled mean expression levels of indicated markers in different cell clusters of CD8<sup>+</sup> T cells (NILER1-4).

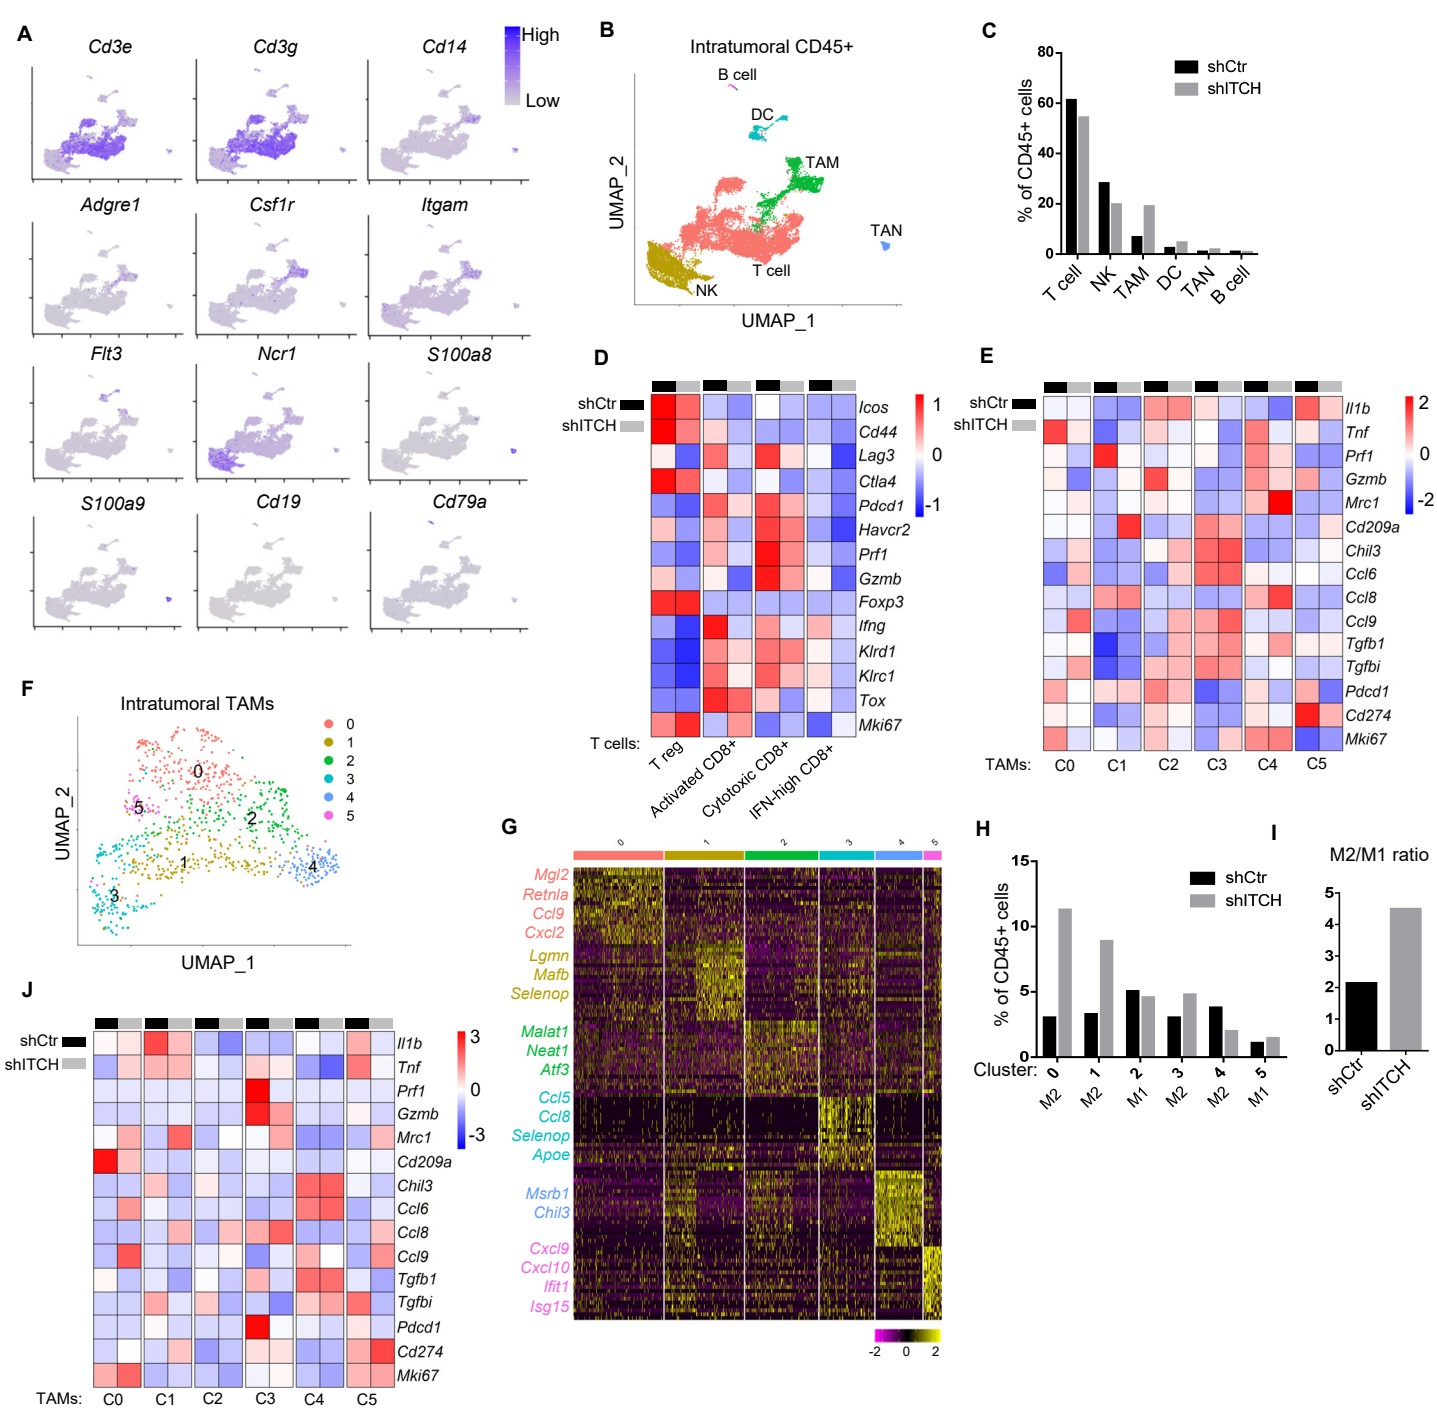

**Supplementary Figure S6.** Impact of tumor cell-intrinsic ITCH deficiency on immune cells and gene expression.

**A**, UMAP of intra-tumoral CD45<sup>+</sup> single cells showing expression levels of indicated cell lineage markers (shCONTROL and ITCH-knockdown NILER1-4 tumors, both on trametinib treatment).

**B**, UMAP of intra-tumoral CD45<sup>+</sup> single cells (in **A**) with indicated cell types denoted by distinct colors. NK (Natural killer cells), TAM (Tumor associated macrophages), DC (Dendritic cells), TAN (Tumor associated neutrophils).

**C**, Fractions of indicated cell types in total CD45<sup>+</sup> cells from NILER1-4 shCONTROL and ITCH-knockdown tumors, both on trametinib treatment.

**D**, Heatmap showing scaled mean expression levels of indicated genes in indicated T cell clusters from shCONTROL and ITCH-knockdown NILER1-4 tumors, both on trametinib treatment.

**E**, Heatmap showing scaled mean expression levels of indicated genes in indicated TAM cell clusters from shCONTROL and ITCH-knockdown NILER1-4 tumors, both on trametinib treatment.

**F**, UMAP of intratumoral TAMs (n = 886) analyzed by scRNA-seq (shCONTROL and ITCH-knockdown YUMM1.7ER tumors, both on trametinib treatment). Different cell clusters denoted by distinct colors.

**G**, Heatmap showing expression levels of differentially expressed genes (rows) among different TAM subpopulations (columns) in **F**. Representative genes of each cluster are highlighted.

**H**, Fractions of each TAM subpopulation in total CD45<sup>+</sup> cells from shCONTROL and ITCH-knockdown YUMM1.7ER tumors, both on trametinib treatment.

**I**, The ratio of M2-like TAMs to M1-like TAMs in shCONTROL and ITCH-knockdown YUMM1.7ER tumors, both on trametinib treatment.

**J**, Heatmap showing scaled mean expression levels of indicated genes in indicated TAM cell clusters from shCONTROL and ITCH-knockdown YUMM1.7ER tumors, both on trametinib treatment.

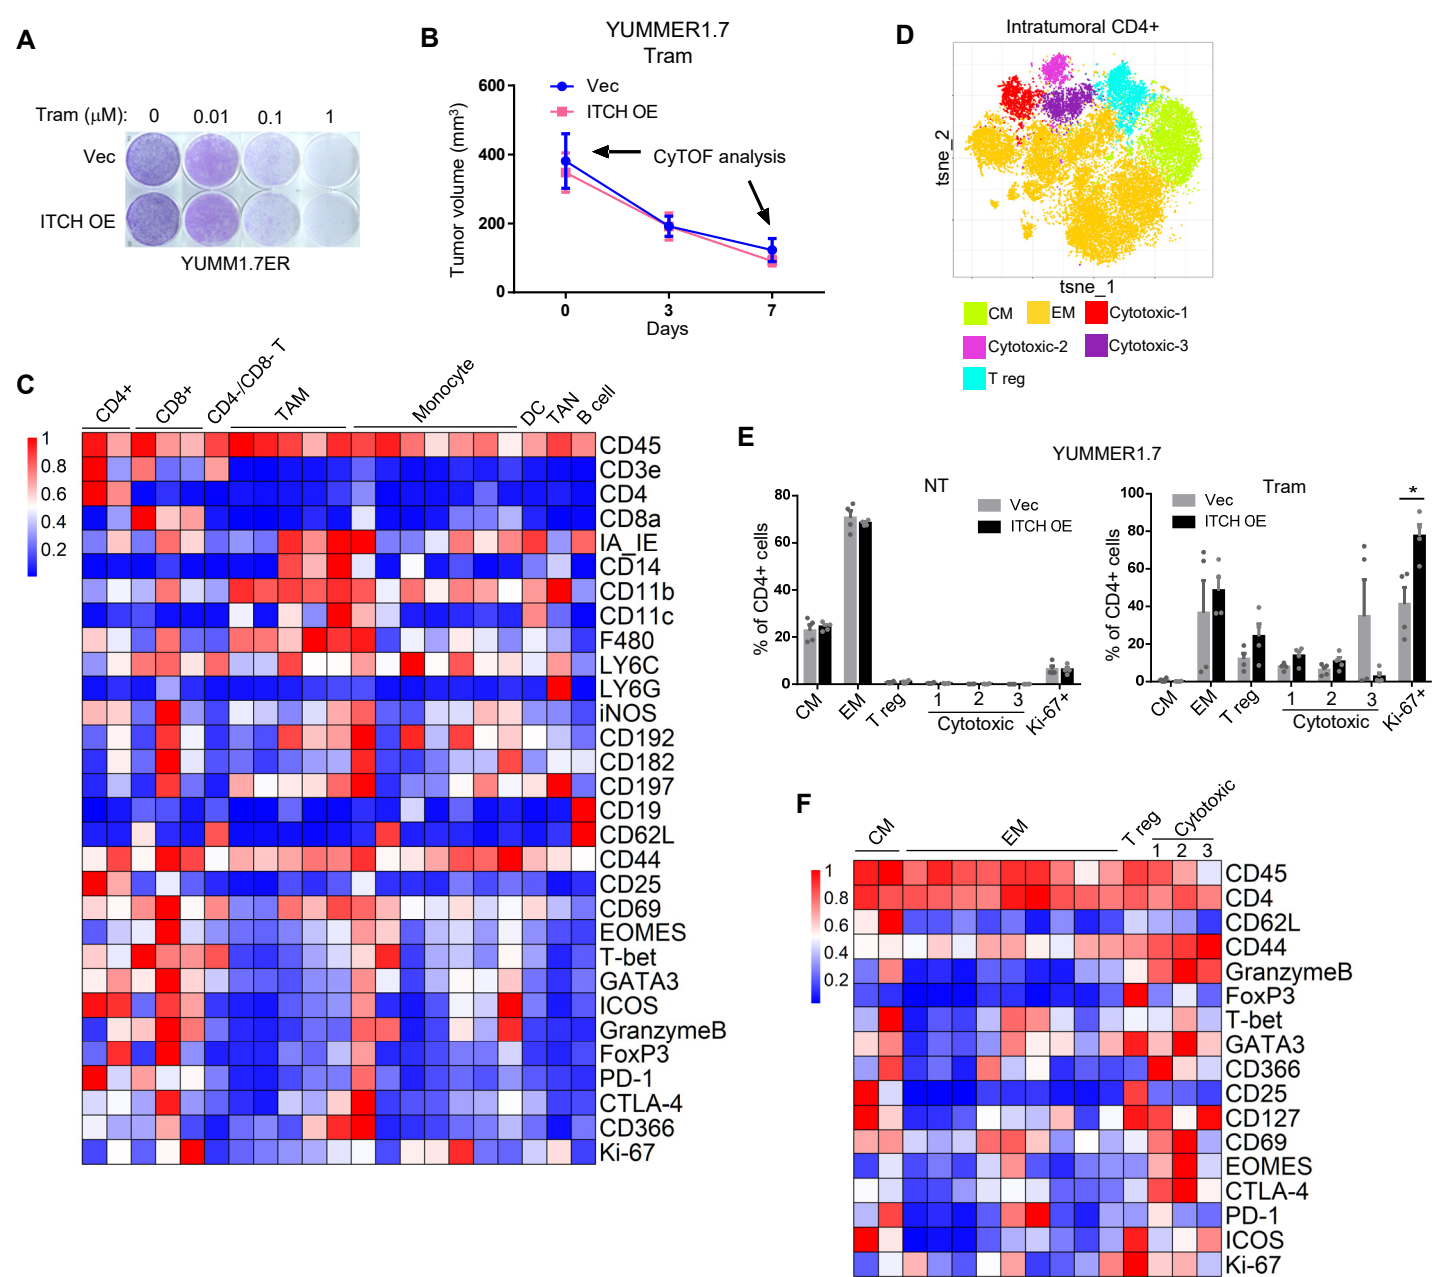

**Supplementary Figure S7.** CyTOF analysis of CD45<sup>+</sup> and CD4<sup>+</sup> populations in YUMM1.7ER control and ITCH over-expression tumors.

**A**, Clonogenic growth (7 days) of YUMM1.7ER cell lines stably expressing empty vector (Vec) and over-expressing (OE) ITCH, off or on trametinib (Tram) treatment at indicated concentrations.

**B**, Tumor growth curves of Vec and ITCH OE YUMM1.7ER tumors on trametinib (Tram, 0.45 mg/kg/d) treatment in C57BL/6 mice. Vec and ITCH OE tumors (n = 4 for each condition) before and after 7 days of trametinib treatment were dissociated into single cells and analyzed by CyTOF. Mean  $\pm$  SEMs (n = 11-12).

**C**, Heatmap showing scaled mean expression levels of indicated protein markers in different cell clusters of CD45<sup>+</sup> cells (YUMM1.7ER, NT and Tram).

**D**, t-SNE map of intra-tumoral CD4<sup>+</sup> cells from Vec and ITCH-OE YUMM1.7ER tumors on NT and trametinib treatment, as analyzed by CyTOF. Inferred cell types denoted by distinct colors.

**E**, Fractions of indicated cell types in CD4<sup>+</sup> T cells from Vec and ITCH-OE YUMM1.7ER tumors on NT or trametinib treatment. Mean  $\pm$  SEMs (n = 4). P value, Student's *t* test. \* *p* < 0.05.

**F**, Heatmap showing scaled mean expression levels of indicated protein markers in different cell clusters of CD4<sup>+</sup> T cells (YUMM1.7ER, NT and Tram).
